# Supplementary material for: A fluorescence-based sweat test sensor in a proof-of-concept clinical study for COVID-19 screening diagnosis
Source: Royal Society of Chemistry journal article supplement (doi:10.1039/d3an00429e), 2023-01-01
Supplement: d3an00429e1.pdf [file d3an00429e1.pdf]

## Supporting Information

### Fluorescent-based sweat test sensor as a proof-of-concept clinical studies for COVID-19 screening diagnosis

Isaya Thaveesangsakulthai<sup>a</sup>, Jinnawat Jongkhumkrong<sup>a</sup>, Kaywalee Chatdarong<sup>b</sup>, Pattama Torvorapanit<sup>c,e</sup>, Wannee Sukbangnop<sup>d</sup>, Thanasat Sooksimuang<sup>d</sup>, Chadin Kulsing<sup>a,f\*</sup>, and Boosayarat Tomapatanaget<sup>a,g\*\*</sup>

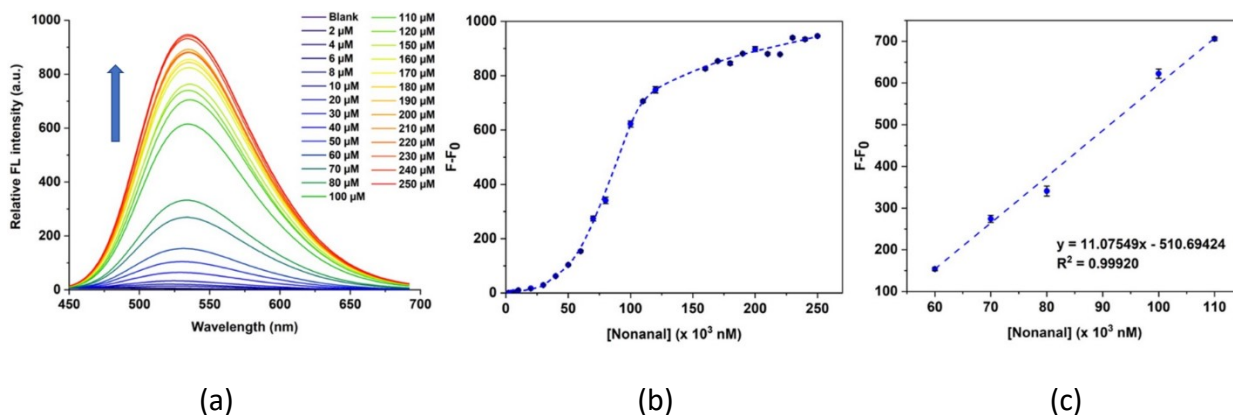

Figure S1 Fluorescent titration (a) titration curve (b) and calibration (c) of EC@dyeNH upon an increment of nonanal

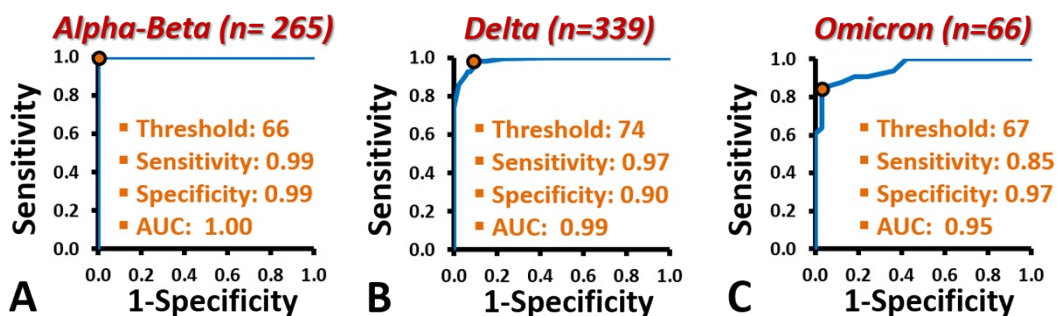

Figure S2. ROC curves of Covid-19 in each prototype including classification rate index of sensitivity, specificity and area under the curve of nonanal by using EC@dyeNH.
